# Supplementary material for: Risk preferences and attitudes to surgery in decision making: A survey of Swedish orthopedic surgeons
Source: PubMed Central journal article supplement — Acta Orthop. 2017 Mar 15;88(5):466–71. doi: 10.1080/17453674.2017.1298353 (PMC5560206; doi:10.1080/17453674.2017.1298353), 2017-03-15
Supplement: IORT_A_1298353_SM0907.pdf [file IORT_A_1298353_SM0907.pdf]

## Supplementary data

Table 2. Regression results from Poisson regression on a count variable indicating the number of suggested operations (0–5) (= dependent variable)

| Variable        | Model 1 <sup>a</sup> | p >  z | 95% CI    | Model 2 <sup>a</sup> | p >  z | 95% CI    |
|-----------------|----------------------|--------|-----------|----------------------|--------|-----------|
| Risk-averse     | 0.96                 | 0.57   | 0.83–1.11 | 0.96                 | 0.63   | 0.82–1.13 |
| Macho attitude  |                      |        |           | 1.04                 | 0.003  | 1.01–1.06 |
| Self-confidence |                      |        |           | 1.02                 | 0.12   | 0.99–1.05 |
| Impulsiveness   |                      |        |           | 0.98                 | 0.25   | 0.95–1.01 |
| Anti-authority  |                      |        |           | 0.99                 | 0.64   | 0.97–1.02 |
| Worry           |                      |        |           | 1.02                 | 0.08   | 1.00–1.04 |
| Resignation     |                      |        |           | 1.02                 | 0.13   | 0.99–1.05 |
| Experience:     |                      |        |           |                      |        |           |
| Resident        |                      |        |           | REF                  |        |           |
| 0–5 years       |                      |        |           | 0.91                 | 0.30   | 0.76–1.09 |
| 5–10 years      |                      |        |           | 0.97                 | 0.68   | 0.83–1.13 |
| > 10 years      |                      |        |           | 0.85                 | 0.08   | 0.72–1.02 |
| Female          |                      |        |           | 1.08                 | 0.28   | 0.94–1.24 |
| Intercept       | 2.83                 | 0.000  | 2.54–3.16 | 1.06                 | 0.88   | 0.50–2.26 |

<sup>a</sup> Values are incidence rate ratio

CI: confidence interval

n = 354; standard errors are clustered at the hospital level. Explanatory variables: (i) attitudes: macho, self-confidence, impulsivity, anti-authority, worry, and resignation are continuous variables measured on a scale ranging from 5 to 25, (ii) risk-averse takes a value of 1 for risk-averse surgeons and 0 otherwise, (iii) experience has 4 categories, (iv) female takes a value of 1 for female surgeons and 0 otherwise. Model 1 tested the primary hypothesis that risk-averse surgeons were less likely to suggest an operation. We also included explanatory variables describing hazardous attitudes and doctor's experience and gender in model 2, in order to investigate whether these factors were associated with the tendency to operate.

Table 3. Mixed-effects Poisson regression on a count variable indicating the number of suggested operations (0–5) (= dependent variable)

| Variable           | Model 3 <sup>a</sup> | p >  z | 95% CI    |
|--------------------|----------------------|--------|-----------|
| Risk-averse        | 0.97                 | 0.70   | 0.85–1.11 |
| Macho              | 1.03                 | 0.002  | 1.01–1.06 |
| Self-confidence    | 1.03                 | 0.10   | 1.00–1.06 |
| Impulsiveness      | 0.98                 | 0.14   | 0.95–1.01 |
| Anti-authority     | 1.00                 | 0.86   | 0.97–1.03 |
| Worry              | 1.02                 | 0.07   | 1.00–1.04 |
| Resignation        | 1.02                 | 0.16   | 0.99–1.05 |
| Experience:        |                      |        |           |
| Resident           | REF                  |        |           |
| 0–5 years          | 0.93                 | 0.49   | 0.75–1.15 |
| 5–10 years         | 0.99                 | 0.92   | 0.80–1.22 |
| > 10 years         | 0.87                 | 0.19   | 0.71–1.07 |
| Female             | 1.06                 | 0.49   | 0.89–1.26 |
| Intercept          | 0.95                 | 0.90   | 0.46–1.99 |
| Variance component | 0.04                 |        | 0.02–0.12 |

<sup>a</sup> Values are incidence rate ratio

CI: confidence interval

n = 354. Explanatory variables: (i) attitudes: macho, self-confidence, impulsiveness, anti-authority, worry, and resignation are continuous variables measured on a scale ranging from 5 to 25, (ii) risk-averse takes a value of 1 for risk-averse surgeons and 0 otherwise, (iii) experience has 4 categories, (iv) female takes a value of 1 for female surgeons and 0 otherwise.

Table 4. Poisson regression on a binary variable indicating whether a surgeon recommended at least one surgery (= dependent variable)

| Variable        | Model 1 <sup>a</sup> | p >  z | 95% CI    | Model 2 <sup>a</sup> | p >  z | 95% CI    |
|-----------------|----------------------|--------|-----------|----------------------|--------|-----------|
| Risk-averse     | 0.92                 | 0.07   | 0.84–1.01 | 0.92                 | 0.07   | 0.84–1.01 |
| Macho           |                      |        |           | 1.02                 | 0.008  | 1.01–1.04 |
| Self-confidence |                      |        |           | 1.01                 | 0.17   | 0.99–1.03 |
| Impulsiveness   |                      |        |           | 0.98                 | 0.06   | 0.96–1.00 |
| Anti-authority  |                      |        |           | 1.00                 | 0.62   | 0.98–1.01 |
| Worry           |                      |        |           | 1.01                 | 0.09   | 1.00–1.02 |
| Resignation     |                      |        |           | 1.02                 | 0.03   | 1.00–1.04 |
| Experience:     |                      |        |           |                      |        |           |
| Resident        |                      |        |           | REF                  |        |           |
| 0–5 years       |                      |        |           | 1.00                 | 0.87   | 0.92–1.11 |
| 5–10 years      |                      |        |           | 0.92                 | 0.17   | 0.81–1.04 |
| > 10 years      |                      |        |           | 0.87                 | 0.009  | 0.78–0.96 |
| Female          |                      |        |           | 1.02                 | 0.74   | 0.92–1.12 |
| Intercept       | 0.86                 | 0.000  | 0.81–9.01 | 0.50                 | 0.006  | 0.31–0.82 |

<sup>a</sup> Values are incidence rate ratio

CI: confidence interval

n = 354; standard errors are clustered at the hospital level. Explanatory variables: (i) attitudes: macho, self-confidence, impulsivity, anti-authority, worry, and resignation are continuous variables measured on a scale ranging from 5 to 25, (ii) risk-averse takes a value of 1 for risk-averse surgeons and 0 otherwise, (iii) experience has 4 categories, (iv) female takes a value of 1 for female surgeons and 0 otherwise. Model 1 tested the primary hypothesis that risk-averse surgeons were less likely to suggest an operation. We also included explanatory variables describing hazardous attitudes and doctor's experience and gender in model 2, in order to investigate whether these factors were associated with the tendency to operate.

## Supplement: translation of the Hazardous Attitude Scale—aviation

| Attitude                     | Aviation                                                                                                              | Orthopedic surgeon English <sup>b</sup>                                                                                                    | Orthopedic surgeon Swedish                                                                                       |
|------------------------------|-----------------------------------------------------------------------------------------------------------------------|--------------------------------------------------------------------------------------------------------------------------------------------|------------------------------------------------------------------------------------------------------------------|
| 1 Self-confidence            | I am a pilot due entirely to my hard work and ability                                                                 | I am a surgeon due entirely to my own hard work and ability                                                                                | Jag har blivit ortoped tack vare hårt arbete och skicklighet                                                     |
| 2 Worry/ anxiety             | While flying at night, I worry about not seeing navigation landmarks and getting lost                                 | When operating on high-energy injuries, I worry about not being able to identify landmarks and getting lost                                | När jag opererar jourfall oroar jag mig för att inte kunna känna igen anatomin och hamna fel                     |
| 3 Worry/ anxiety             | If I fly over water, I worry about having to ditch if the engine quits                                                | If my operation is dependent on a specific instrument functioning, I worry about having to complete the operation if that instrument fails | Jag oroar jag mig för att det ska saknas specialinstrument, som visar sig behövas under operationens gång        |
| 4 Self-confidence            | I can learn any flying skill if I put my mind to it                                                                   | I can learn any surgical skill if I put my mind to it                                                                                      | Jag kan lära mig alla typer av operationer om jag bestämmer mig för det                                          |
| 5 Macho                      | I like to practice stalls                                                                                             | I like to do challenging procedures                                                                                                        | Jag tycker om tekniskt svåra operationer                                                                         |
| 6 Impulsive                  | I really hate being delayed when I fly on a trip                                                                      | I really hate having my cases delayed                                                                                                      | Jag avskyr att vänta på att få operera                                                                           |
| 7 Macho                      | I like to practice unusual aircraft attitudes                                                                         | I like to do challenging operations                                                                                                        | Jag gillar ovanliga implantat.                                                                                   |
| 8 Worry/ anxiety             | I really worry about having to make an emergency landing                                                              | I really worry about having to abort a surgical procedure                                                                                  | Jag oroar mig över att bli tvungen att avbryta en operation                                                      |
| 9 Impulsive                  | If the weather is marginal, I don't mind waiting at the airport until it clears up                                    | If the patient's medical condition is questionable, I don't mind waiting for anesthesia to "line up" the patient                           | Om patientens hälsotillstånd är osäkert har jag inget emot att vänta tills narkosläkaren har optimerat patienten |
| 10 Worry/ anxiety            | I always worry about an accident when I am flying                                                                     | I always worry about technical errors and complications when operating                                                                     | Jag oroar mig ofta för att hamna i en situation under operationen som jag inte kan lösa                          |
| 11 Impulsive                 | I am basically an impatient pilot                                                                                     | I am basically an impatient surgeon                                                                                                        | I grunden är jag en otålig kirurg                                                                                |
| 12 Macho                     | I like to practice spins                                                                                              | I like high-risk operations                                                                                                                | Jag tycker om utmaningen i en högriskoperation                                                                   |
| 13 Anti-authority            | The FAA is more concerned with restricting access to aviation than providing the services aviation needs              | The OR administration is more concerned with restricting access to the OR than providing the services when needed                          | Operationspersonalen är mer angelägen om att följa rutiner än att leverera de instrument jag behöver             |
| 14 Resignation/ <sup>a</sup> | Sometimes I feel that I have very little control over what happens to the aircraft                                    | Sometimes I feel that I have very little control over what happens to the patient                                                          | Ibland känner jag att jag har väldigt lite kontroll över operationsförloppet                                     |
| 15 Resignation/ <sup>a</sup> | In a tight situation, I trust to fate                                                                                 | In a tight situation, I trust to fate                                                                                                      | I en pressad situation lutar jag på turen                                                                        |
| 16 Worry/ anxiety            | I really worry about mid-air collisions                                                                               | I really worry about needlestick injuries                                                                                                  | Jag oroar mig för allvarliga narkoskomplikationer                                                                |
| 17 Resignation/ <sup>a</sup> | Sometimes I feel like the airplane has a mind of its own                                                              | Sometimes I feel that the patient's outcome is pre-set even before I start                                                                 | Ibland känner det som att operationsresultatet är förutbestämt                                                   |
| 18 Impulsive                 | If I want to fly somewhere, I want to do it now                                                                       | If I decide to operate on someone, I want to do it now                                                                                     | Om jag bestämmer att någon behöver opereras så vill jag göra det direkt                                          |
| 19 Self-confidence           | The thoroughness of my preflight mostly determines the likelihood of my having mechanical trouble with the aircraft   | The thoroughness of my preoperative plan mostly determines the likelihood of my having a problem during the case                           | Min omsorgsfulla preoperativa planering minskar risken för perioperativa problem                                 |
| 20 Anti-authority            | Air traffic control is more of a hindrance than a help                                                                | The OR scheduling desk is more of a hindrance than a help                                                                                  | Operationskoordinatören är mera ett hinder än till hjälp                                                         |
| 21 Resignation/ <sup>a</sup> | When I'm in a tough spot, I figure if I make it, I make it, and if I don't, I don't                                   | When I'm in a tough spot, I figure that if I make it, I make it, and if I don't, I don't                                                   | I en svår operationssituation tänker jag att det får gå som det går                                              |
| 22 Macho                     | I like to practice steep turns                                                                                        | I like to do difficult procedures                                                                                                          | Det är roligt att operera fort                                                                                   |
| 23 Impulsive                 | If you want to protest a license suspension by the FAA, the odds are stacked against you                              | If you want to protest a license suspension by the state medical licensing authority, the odds are stacked against you                     | Om någon ifrågasätter mina operationsindikationer blir jag förbannad                                             |
| 24 Anti-authority            | The FAA is more of a hindrance than a help                                                                            | The OR scheduling desk is more of a hindrance than a help                                                                                  | Startkontrollen är ett administrativt påhitt utan större värde                                                   |
| 25 Resignation/ <sup>a</sup> | In flying, what will be, will be                                                                                      | In surgery, what will be, will be                                                                                                          | Börjar en operation gå illa så blir det ofta värre                                                               |
| 26 Anti-authority            | In general, I find ATC to be very helpful                                                                             | In general, I find the OR scheduling desk to be very helpful                                                                               | Patientsäkerhetsarbetet har gjort mina operationer säkrare                                                       |
| 27 Self-confidence           | If I have done something illegal while flying, I will report it myself because I figure someone will report it anyway | If I have done something wrong in the OR, I will report it because someone will report me anyway                                           | Om jag har gjort en dålig operation är jag öppen med det, eftersom det ändå kommer ut                            |
| 28 Self-confidence           | A successful flight is solely due to good planning and good execution                                                 | A successful surgery is solely due to good planning and good execution                                                                     | En framgångsrik operation beror enbart på god planering och gott genomförande                                    |
| 29 Anti-authority            | Most FAA regulations do not promote safety                                                                            | Most OR administration rules do not promote safety                                                                                         | De flesta regler på opsalen främjar inte patientsäkerheten                                                       |
| 30 Macho                     | I like to practice unusual attitudes in flying                                                                        | I like to do unusual procedures                                                                                                            | Jag gillar ovanliga operationer                                                                                  |

<sup>a</sup> external locus of control; <sup>b</sup> Kadzielski et al. 2015.
